# Supplementary material for: Prediction of malaria transmission drivers in Anopheles mosquitoes using artificial intelligence coupled to MALDI-TOF mass spectrometry
Source: PubMed Central journal article supplement (PMC7347643; doi:10.1038/s41598-020-68272-z), 2020-07-09
Supplement: 41598_2020_68272_MOESM6_ESM.pdf [file 41598_2020_68272_MOESM6_ESM.pdf]

Prediction of malaria transmission drivers in *Anopheles* mosquitoes using artificial intelligence coupled to MALDI-TOF mass spectrometry

Cécile Nabet<sup>1\*</sup>, Aurélien Chaline<sup>2,3</sup>, Jean-François Franetich<sup>4</sup>, Jean-Yves Brossas<sup>2</sup>, Noémie Shahmirian<sup>2</sup>, Olivier Silvie<sup>4</sup>, Xavier Tannier<sup>5</sup>, Renaud Piarroux<sup>1</sup>

Table S1. Classification performance of the artificial neural network trained for age prediction using legs.

| Legs                | Experiment 1 (n=339) |       |       | Experiment 2 (n=112) |       |       |
|---------------------|----------------------|-------|-------|----------------------|-------|-------|
| Age category (days) | 0-10                 | 11-20 | 21-28 | 0-10                 | 11-20 | 21-28 |
| TP                  | 42                   | 146   | 32    | 8                    | 51    | 19    |
| FP                  | 16                   | 91    | 12    | 2                    | 20    | 12    |
| TN                  | 243                  | 89    | 227   | 102                  | 28    | 60    |
| FN                  | 38                   | 13    | 68    | 0                    | 13    | 21    |
| SS (%)              | 53                   | 92    | 32    | 100                  | 80    | 48    |
| SP (%)              | 94                   | 49    | 95    | 98                   | 58    | 83    |
| PPV (%)             | 72                   | 62    | 73    | 80                   | 72    | 61    |
| NPV (%)             | 86                   | 87    | 77    | 100                  | 68    | 74    |
| Acc (%)             | 84                   | 69    | 76    | 98                   | 71    | 71    |

TP: true positive, FP: false positive, TN: true negative, FN: false negative, SS: sensitivity, SP: specificity, PPV: positive predictive value, NPV: negative predictive value, Acc: accuracy.

Table S2. Classification performance of the artificial neural network trained for age prediction using the head.

| Head    | Experiment 1 (n=340) |      |       | Experiment 2 (n=112) |      |       |       |
|---------|----------------------|------|-------|----------------------|------|-------|-------|
|         | Age category (days)  | 0-10 | 11-20 | 21-28                | 0-10 | 11-20 | 21-28 |
| TP      |                      | 45   | 104   | 74                   | 8    | 53    | 18    |
| FP      |                      | 24   | 60    | 33                   | 2    | 22    | 9     |
| TN      |                      | 236  | 120   | 207                  | 102  | 26    | 63    |
| FN      |                      | 35   | 56    | 26                   | 0    | 11    | 22    |
| SS (%)  |                      | 56   | 65    | 74                   | 100  | 83    | 45    |
| SP (%)  |                      | 91   | 67    | 86                   | 98   | 54    | 88    |
| PPV (%) |                      | 65   | 63    | 69                   | 80   | 71    | 67    |
| NPV (%) |                      | 87   | 68    | 89                   | 100  | 70    | 74    |
| Acc (%) |                      | 83   | 66    | 83                   | 98   | 71    | 72    |

TP: true positive, FP: false positive, TN: true negative, FN: false negative, SS: sensitivity, SP: specificity, PPV: positive predictive value, NPV: negative predictive value, Acc: accuracy.

Table S3. Classification performance of the artificial neural network trained for age prediction using the abdomen.

| Abdomen | Experiment 1 (n=340) |      |       | Experiment 2 (n=112) |      |       |       |
|---------|----------------------|------|-------|----------------------|------|-------|-------|
|         | Age category (days)  | 0-10 | 11-20 | 21-28                | 0-10 | 11-20 | 21-28 |
| TP      |                      | 35   | 128   | 38                   | 7    | 52    | 14    |
| FP      |                      | 18   | 103   | 18                   | 4    | 24    | 11    |
| TN      |                      | 242  | 77    | 222                  | 100  | 24    | 61    |
| FN      |                      | 45   | 32    | 62                   | 1    | 12    | 26    |
| SS (%)  |                      | 44   | 80    | 38                   | 88   | 81    | 35    |
| SP (%)  |                      | 93   | 43    | 93                   | 96   | 50    | 85    |
| PPV (%) |                      | 66   | 55    | 68                   | 64   | 68    | 56    |
| NPV (%) |                      | 84   | 71    | 78                   | 99   | 67    | 70    |
| Acc (%) |                      | 81   | 60    | 76                   | 96   | 68    | 67    |

TP: true positive, FP: false positive, TN: true negative, FN: false negative, SS: sensitivity, SP: specificity, PPV: positive predictive value, NPV: negative predictive value, Acc: accuracy.

Table S4. Classification performance of the artificial neural network trained for past blood meals using the abdomen and head.

|         | Experiment 1    |              | Experiment 2    |              |
|---------|-----------------|--------------|-----------------|--------------|
|         | Abdomen (n=340) | Head (n=340) | Abdomen (n=112) | Head (n=112) |
| TP      | 69              | 53           | 16              | 12           |
| FP      | 16              | 25           | 7               | 20           |
| TN      | 184             | 175          | 73              | 55           |
| FN      | 71              | 87           | 16              | 25           |
| SS (%)  | 49              | 38           | 50              | 32           |
| SP (%)  | 92              | 88           | 91              | 73           |
| PPV (%) | 81              | 68           | 70              | 38           |
| NPV (%) | 72              | 67           | 82              | 69           |
| Acc (%) | 74              | 67           | 79              | 60           |

TP: true positive, FP: false positive, TN: true negative, FN: false negative, SS: sensitivity, SP: specificity, PPV: positive predictive value, NPV: negative predictive value, Acc: accuracy.

Table S5. Classification performance of the artificial neural network trained for the detection of *Plasmodium* infection using the abdomen and head.

|         | Experiment 1    |              | Experiment 2    |              |
|---------|-----------------|--------------|-----------------|--------------|
|         | Abdomen (n=340) | Head (n=340) | Abdomen (n=112) | Head (n=112) |
| TP      | 61              | 71           | 24              | 8            |
| FP      | 80              | 95           | 21              | 32           |
| TN      | 160             | 145          | 51              | 54           |
| FN      | 39              | 29           | 16              | 18           |
| SS (%)  | 61              | 71           | 60              | 31           |
| SP (%)  | 67              | 60           | 71              | 63           |
| PPV (%) | 43              | 43           | 53              | 20           |
| NPV (%) | 80              | 83           | 76              | 75           |
| Acc (%) | 65              | 64           | 67              | 55           |

TP: true positive, FP: false positive, TN: true negative, FN: false negative, SS: sensitivity, SP: specificity, PPV: positive predictive value, NPV: negative predictive value, Acc: accuracy.

Figure S1. Representative mass spectra protein profiles using the thorax of *Anopheles stephensi* (unfed), at 7 age points during **a** experiment 1 and **b** experiment 2.

Figure S2. Thorax mass spectra protein profiles of the 3 categories of *Anopheles stephensi* (unfed, fed and uninfected, infected) at 2 ages and times post blood-feeding, experiment 2.

Figure S3. Legs mass spectra protein profiles of the 3 categories of *Anopheles stephensi* (unfed, fed and uninfected, infected) at 2 ages and times post blood-feeding, experiment 2.

Figure S4. Head mass spectra protein profiles of the 3 categories of *Anopheles stephensi* (unfed, fed and uninfected, infected) at 2 ages and times post blood-feeding, experiment 2.

Figure S5. Abdomen mass spectra protein profiles of the 3 categories of *Anopheles stephensi* (unfed, fed and uninfected, infected) at 2 ages and times post blood-feeding, experiment 2.
